# Supplementary material for: Retracted Article: FOXC1 silencing promotes A549 cell apoptosis through inhibiting the PI3K/AKT/hedgehog/Gli2 signaling pathway
Source: Royal Society of Chemistry journal article supplement (doi:10.1039/c8ra06041j), 2018-01-01
Supplement: c8ra06041j2.pdf [file c8ra06041j2.pdf]

1 **Supplementary fig1. FOXC1 silence reduces cell survival and increases cell**  
2 **apoptosis in SK-MES-1 cells.** (A) Relative FOXC1 expression levels are examined  
3 by RT-PCR; (B): Relative FOXC1 protein expression is examined by western blot;  
4 (C): CellTiter 96® Aqueous One Solution Cell Proliferation Assay (MTS) is used to  
5 determine cell survival; (D): Cell Death Detection ELISA plus kit is used to detect  
6 cell apoptosis. SK-MES-1 cells are transfected with FOXC1 siRNA or non-specific  
7 control siRNA (siNC) for 48 h. The data in this article are expressed as means ±  
8 standard deviation (SD) of triplicate of three independent experiments. \*p values <  
9 0.05 versus control group.  
10
