# Supplementary figures and images for: Retracted Article: FOXC1 silencing promotes A549 cell apoptosis through inhibiting the PI3K/AKT/hedgehog/Gli2 signaling pathway
Source: Royal Society of Chemistry journal article supplement (doi:10.1039/c8ra06041j), 2018-01-01

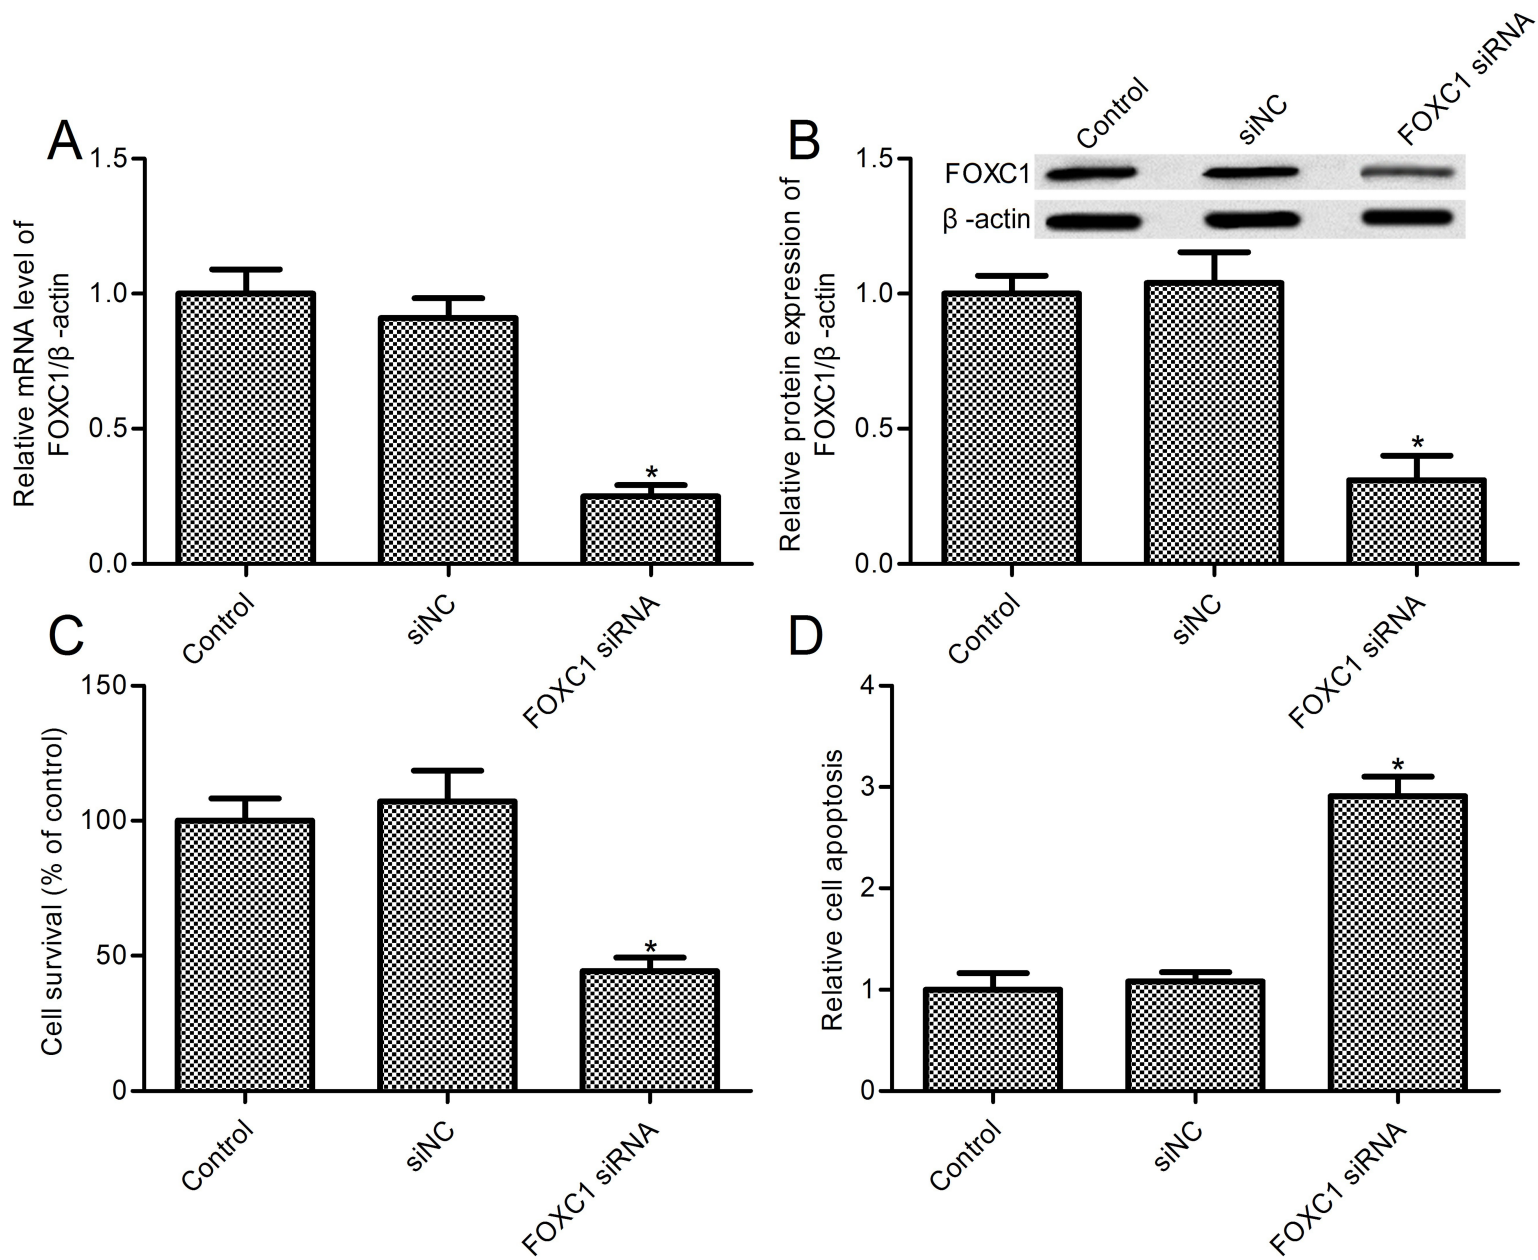

Supplement: c8ra06041j3.pdf [file c8ra06041j3.pdf]
